# Supplementary material for: Molecular characterization of mutations in white-flowered torenia plants
Source: PubMed Central journal article supplement (PMC4234012; doi:10.1186/1471-2229-14-86), 2014-04-02
Supplement: 1471-2229-14-86-S1.pdf [file 1471-2229-14-86-S1.pdf]

**Supplementary Table S1. Primers used in this study.**

| Primer                                                     |         | Sequence                               | Expected fragment length |
|------------------------------------------------------------|---------|----------------------------------------|--------------------------|
| <b>RT PCR analysis</b>                                     |         |                                        |                          |
| <i>CHS</i>                                                 | Forward | 5'-GATTCGMAGGGCTCAGAGAGCTGAAGG-3'      | 1143bp                   |
|                                                            | Reverse | 5'-GGGCGTGCTGTGMAGSACAACGGTCTC-3'      |                          |
| <i>CHI</i>                                                 | Forward | 5'-AAGAACGAAGTATCCCACCAG -3'           | 335bp                    |
|                                                            | Reverse | 5'-TCCACGATCATTGACCTAAACC-3'           |                          |
| <i>F3H</i>                                                 | Forward | 5'-ATGCACGAGCAGGACCACTAACCCCTA -3'     | 1104bp                   |
|                                                            | Reverse | 5'-CTATTTAGTTTTCCCATTTAAGATG -3'       |                          |
| <i>DFR</i>                                                 | Forward | 5'-GTATGAGCATGGAAGTAGTAGTACCAAAAAG -3' | 1060bp                   |
|                                                            | Reverse | 5'-TGCATGTTCTATTCTATCTTATGTTCTCCA -3'  |                          |
| <i>ANS</i>                                                 | Forward | 5'-TCCCAAAGAACATGGTTTCTCCAGCATCTC-3'   | 1172bp                   |
|                                                            | Reverse | 5'-CCAAAACAATCATCAAACAATAAACTCCAC-3'   |                          |
| <i>F3'H</i>                                                | Forward | 5'-CCATGAGTCCCTTAGCCTTGATGATCCTAA-3'   | 1632bp                   |
|                                                            | Reverse | 5'-CCATACCATAACCATACCATGCAAACCTCACA-3' |                          |
| <i>F3'5'H</i>                                              | Forward | 5'-GTAATCCGTCGACCTTTTATTGTATGG-3'      | 1617bp                   |
|                                                            | Reverse | 5'-GGATTGGATCTATGGAAGATAACAATGT-3'     |                          |
| <i>5GT</i>                                                 | Forward | 5'-AATGGTTAACAACGCCATATTCTACTAGC-3'    | 1477bp                   |
|                                                            | Reverse | 5'-CGACGTCCATAACAACAATAATAACATATA-3'   |                          |
| <i>FNSII</i>                                               | Forward | 5'-ATGGACACAGTCTTAATCACACTCTACACC-3'   | 1549bp                   |
|                                                            | Reverse | 5'-CCCTACTACATCAAGCACCCGATATTGTGG-3'   |                          |
| <i>ACT3</i>                                                | Forward | 5'-GCTGTTCTCTCCCTTTATGC-3'             | 921bp                    |
|                                                            | Reverse | 5'-GCACACAGAGAATAGCAAAC-3'             |                          |
| <i>MYB1</i>                                                | Forward | 5'-TTCGCGTTCAAATGAGTAGAGACAAAATAT-3'   | 880bp                    |
|                                                            | Reverse | 5'-ATAATTAATTACCACCATAACATGGTCTCC-3'   |                          |
| <i>bHLH1</i>                                               | Forward | 5'-ATGGACAATGAAGTGGTTACAGAGAATCTA-3'   | 1905bp                   |
|                                                            | Reverse | 5'-TCAACTCTTGTGATAACTTTCTGAAGAGCC-3'   |                          |
| <b>Amplification of genomic sequences</b>                  |         |                                        |                          |
| <i>F3H</i>                                                 | Forward | Same as RT-PCR                         |                          |
|                                                            | Reverse | Same as RT-PCR                         |                          |
| <i>F3'H</i>                                                | Forward | 5'-ATTAGCCATGAGTCCCTTAGCCTTGATG-3'     |                          |
|                                                            | Reverse | 5'-TACAAGCACCATAACCATAACCATG-3'        |                          |
| <i>F3'5'H</i>                                              | Forward | Same as RT-PCR                         |                          |
|                                                            | Reverse | Same as RT-PCR                         |                          |
| <b>Amplification of 5'upstream regions of <i>F3H</i></b>   |         |                                        |                          |
| Inverse PCR                                                | Forward | 5'-TCTCTGGGATTGACGATGACGACGATGAAT -3'  |                          |
|                                                            | Reverse | 5'-AAACTTTTCATGCAGCGATTTTCGAGCGC -3'   |                          |
| Transient expression assay                                 |         |                                        |                          |
| for 1k, 1.6k, 4.5kbp promoters                             | Forward | 5'-CCTGCAGGAGTTGGGCAAACGCTACCA-3'      |                          |
|                                                            | Reverse | 5'-ACTAGTTGGTCCTGATCGCGCCATATG-3'      |                          |
| for 300bp promoter                                         | Forward | 5'-CCTGCAGGTGTATTCCAAAATATCAAT-3'      |                          |
|                                                            | Reverse | 5'-ACTAGTTGGTCCTGATCGCGCCATATG-3'      |                          |
| <b>Probes for northern blot and southern blot analysis</b> |         |                                        |                          |
| <i>F3H</i>                                                 | Forward | Same as RT-PCR                         |                          |
|                                                            | Reverse | Same as RT-PCR                         |                          |
| <i>F3'H</i>                                                | Forward | Same as RT-PCR                         |                          |
|                                                            | Reverse | Same as RT-PCR                         |                          |
| <i>F3'5'H</i>                                              | Forward | Same as RT-PCR                         |                          |
|                                                            | Reverse | Same as RT-PCR                         |                          |
| <i>LTR of Tfi1</i>                                         | Forward | 5'-TTGTTGAGAATTCTTGCTCT-3'             |                          |
|                                                            | Reverse | 5'-TGTGGAGAAATTAGCTCATG-3'             |                          |
| <i>Gag-pol protein of TORE1</i>                            | Forward | 5'-ATGGCTGCGAGGTTCCAAGT -3'            |                          |
|                                                            | Reverse | 5'-CTACTTGCCCACTGTTGTTC -3'            |                          |
