# Supplementary material for: Molecular characterization of mutations in white-flowered torenia plants
Source: PubMed Central journal article supplement (PMC4234012; doi:10.1186/1471-2229-14-86), 2014-04-02
Supplement: 1471-2229-14-86-S2.pdf [file 1471-2229-14-86-S2.pdf]

## Additional file 2: Figure S1

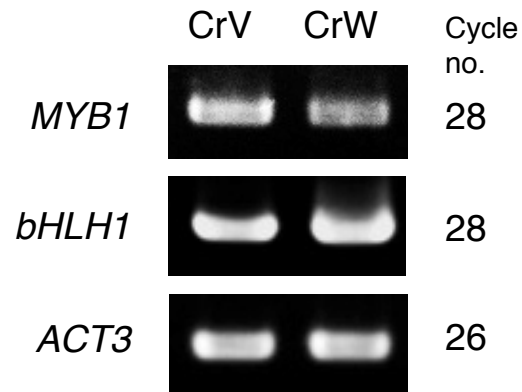

**Fig. S1 Expression analyses of two transcription factor genes in CrV and CrW.**

RT-PCR analysis of *TfMYB1* and *TfbHLH1* and the  $\beta$ -actin gene. *TfMYB1* and *TfbHLH1* are suggested to be involved in anthocyanin biosynthesis in torenia. Gene names and PCR cycles are shown to the left and right of each panel, respectively.

## Additional file 2: Figure S2

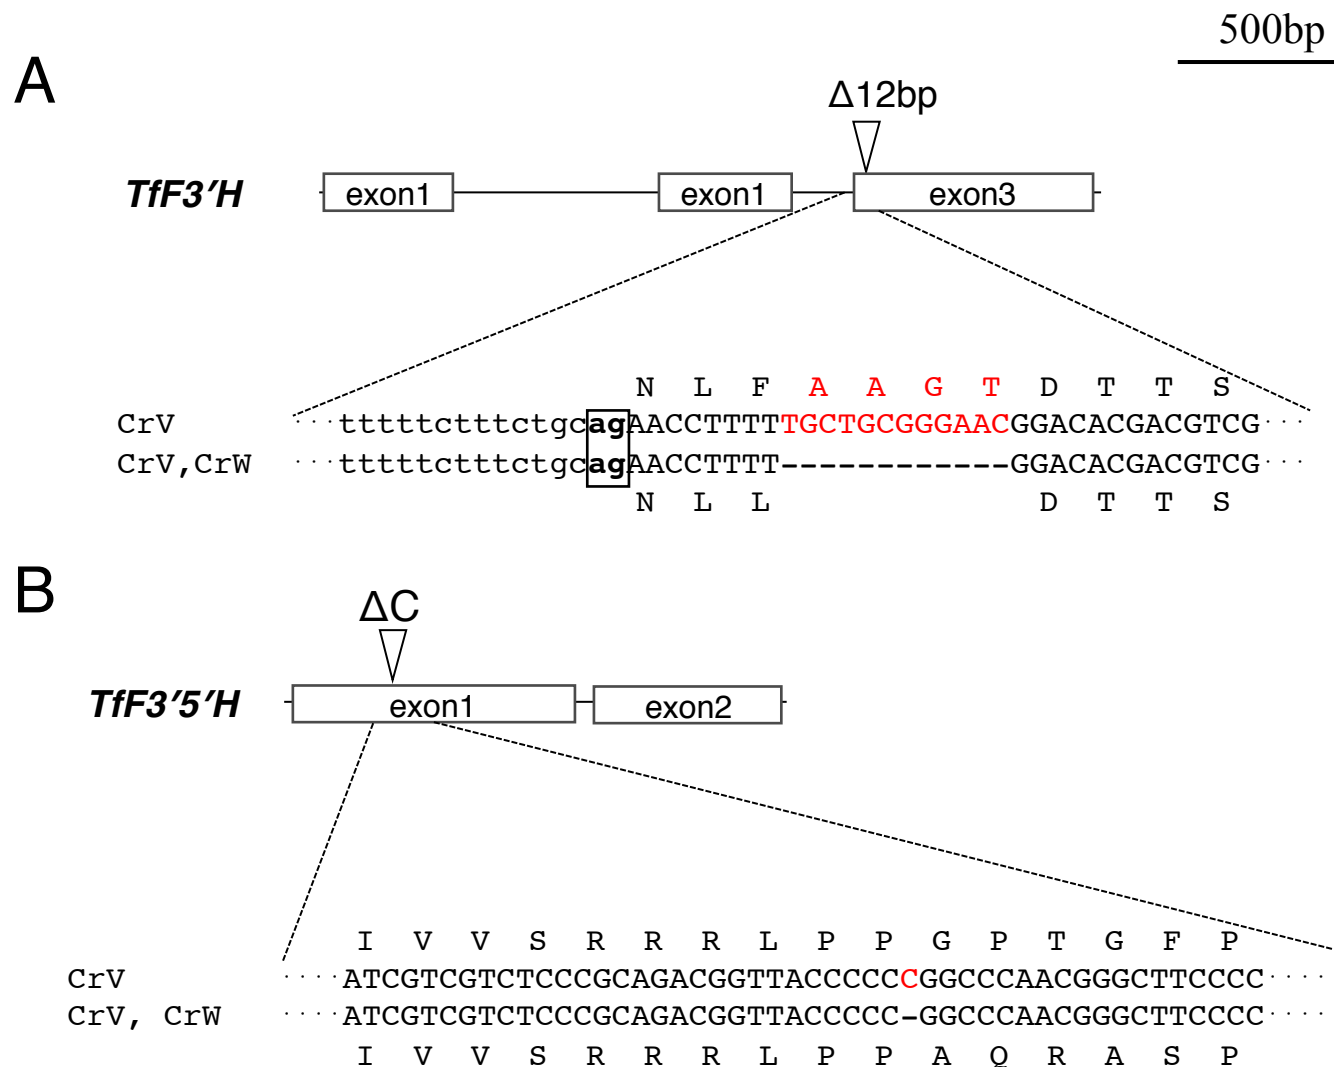

**Fig. S2 Schematic structure and mutated sequences of *ThF3'H* and *ThF3'5'H* genes.**

(A) The *ThF3'H* gene consists of three exons and two introns. The deduced amino acid sequence corresponding to the 12-bp deletion in CrW is shown. Small letters indicate intron sequence, and an acceptor site (ag) is boxed. (B) The *ThF3'5'H* gene consists of two exons and one intron. The deduced amino acid sequence corresponding to the cytosine deletion in CrW is shown.

## Additional file 2: Figure S3

```
...GCACGAACCAAGTCATTCATTTAATGATGTGAGAAAATGTCATACTTTAATTGATATTTTGGAAATACAATGTTGGAGAAATTAGCTCATGAACCTGGCTAGTTGGAGCTGAAA
TSD
ACTGGTTGCATGGTTTTGTTTCTGGTTGTGTGAAGAATCGTCGATGCTTATGAGAAGAAAATGCAGTGGGAAGAGTAAAGAGTTATAAGTGTGTTATCACTTATAAAGTTGC
TGTTTACTATATCACGTTTTCTTTGAGAGCTGCACATGGGAACCGTTAATGAGCAGTTTAAAGCTGAAGCAAGATTGFTGTCTGTTAGTTCCGGTTTCAAGTAGCAGTT
TTGCAGATCTCAACTTGGTGTGTAGTTAGCCAAATTAAGCATTAAATTCGGTTGAAAAGCTCACATTACATACAACACATTGTAACATCATCACTCAATAAAATTC
TCTCTCGTCCCGTAGGAGTAGGGCTAAAAGTTAGCCGCCAACCAGTTAAATCTGTTTCTCTGAGACTTTTCTGATTTCGTCTTATTAATCAAGTTTCTCGATC
CAAACCGGTAGTAAACATATACAAGACTTGTAACTTTAATCTTGAGCATCTAAGAGCAAGAATTCTCAAAGTGGTGGGTTGAGCGTGGATAACTCGAAGATGGCTGC
PBS M A A
GAGGTTCAAGTTGAAAAGTTCACGGGTGATAATGACTTCGGTTTGTGGAAAATGAAGATGAGGGCGTTGCTTACCCAACAAGGGCTGATAGAGGTGTTGATGGTGGAGGA
R F E V E K F T G D N D F G L W K M K M R A L L T Q Q G L I E V L M V E D
TCCACCGGCCACAGTGGTGGCTGGGACTGCTCCGACGGGCCAAGAAGATGCCGCTGCTGCAGCTGTAATGCACAAGCTGCCGCAGAGAAGAAAATCTTGATTCGAAGGC
P P A T V V A G T A P T G Q E D A A A A A V N A Q A A A E K K I L D S K A
GCATTAGTATCTTGTAGTTTGGGAGATCGAGTCTTGGCGTCAAGTCTCTCATGAATCAACCGCTCTTGGTCTGTGGAAGAAATGGGAAGAGCTTTACATGACAAAGTC
H S V I I L S L G D R V L R Q V S H E S T A L G L W K K L E E L Y M T K S
TCTTGCCAATCGACTTATCTCAAGCAAGCGCTCTATTCGTTCAAGATGATTGAAGAAAAGGCCATTGATGAGCAGATGGATCAGTTTATCAAGTGAATTTTGATCTTGA
L A N R L Y L K Q A L Y S F K M I E E K A I D E Q M D Q F I K L I L D L E
AAACATCGAAGTGAAGATAGAGGATGAGGATCAAGCCTTCTGCTCTTGGTGTGTGCTTTGGCTCGGAGTTACAACACATTCAAGGACACGTTGTTGTATGGCCGAGAGACTT
N I E V K I E D E D Q A L L L V C A L P R S Y N T F K D T L L Y G R E T L
GACTTTGAAAGAGGTGCAAGCCGCGTTGAAGTCAAGACGCTGAACACGAGGATGATAACAAGGCAGTGGGATCTACATCCGAGGCTCTTTATGTTAAAGGGAAAGGTTGA
T L K E V Q A A L K S K Q L N T R I D N K A V G S T S E A L Y V K G K G E
AGAGAAGAAAACACAAAGAAAAGAAAAGAACAGTCCAAAAGAAAGTTAAATGTTTCTTATTTGCGATGAGGAGGTCATATGTCAAGAATTTGCCAAGAAGGAGAGAGA
E K K T H K E R K N K S K K K V K C F Y C D E E G H M C K N C P K K E R D
CAAGGGCAAGAAAGTGGAGCAAGGCAGGCTGCAATGGCTTGTGAAAGTTATGAGTCCGGTCAAGCTCTTGGCCGTGACTCATGAAGATCAAGATGTGACCAAAATCTGAAA
K G K K V E Q G E A A M A C E S Y T E S A D V L A V T H E D Q D V T K S E A
ATCTGGTAAATGGCTACTTGTATCCGCTTCTTCTTTTCATGTACATGTGTTAAGTCTTGGATTTAAAGACTTTAAGGGTTGTGATGGTGTCTGGTCTCTGTTGGGAAGA
S G K W L L D S A S S F H V T C V K S W I K D F K G C D G C L V S V G E E
AAAGCAATACAAAATTTGGGCTTTTGAACGGTTAAAATAAGGCTTAAAACCGGTGGAGTAAGAATTTTGAAGAAATGTGAAGTTTATCCGGATTTGGGTAGAAAACCTTAT
K Q Y K I L G F G T V K I R L K T G G V R I L R N V K F I P D L G R N L I
TTCTGTAGGGTTGTTGGATGTTCAAGGCTTTAAGTGTGTGCTGGAATGGTGTGATGAAGTTTCAAAGGGTCTAAGGTGATTATGAGTGGTACTTTGCAGAAAACAG
S V G L L D V Q G F K C V A G N G V M K V F K G S K V I M S G T L Q K N R
AACTTATCATGTTACAGGATCTGAAACAGTGGTGAAGTGGGCTGGTTGGGCTCGTAAAATCTGCTGTGGTATTCGGGAGTGAAGGTTTGTTCAGGGTAAATAGTAT
T Y H V T G S E T V V N W A G L G A R K I C G D S G S E R F V Q G N S I
CCTATGTGGTATCATGATAAGGCCGGGTTTGAAGGAGTTACACAAGGGGAGATCACAGATCAGAGGGCTCAAAGTGAGGATCTGACACTTTTATGTTCTGAGGTGGAGCA
L C G D H D K A G F E Q V T Q G E I T D Q R A Q Q S E G S D T L L S E V E Q
GATTTGTGAGAGTTGGTAGAGTTCTTTTGTCCAGTTTCTGGGAAGATTGAAATTTATCTGAGGAATGGGATATTCCTGGAGGCTGATTTGGTGGCCAACTACAAGGATC
I C V R V G R V L C P V S G K D L N Y L R N G D I P E A D C G G Q L Q G S
GAATCTGCAAGTGAAGGAAGTGGGACTTATCAAGTTTGAAGGGCTGAAAATGTGATTTCTGAGTCTGTTGGTGGTGAATCTGTTGGTCTTCGAGTTTCTCGTGG
N L Q V T K E V G L I K F E R L K N V I S E S C L V V D N C G A S S F P G
GGCTGTGAAGATCAAACACTCAGTTTAAATCTGCAGAATGGGAGTTGGTTTACAGTGGAGGAAAATGAAGCAAAATGGTTCAGTTTATGAATGCTCAAATCTGATGA
A A E D Q T Q F N L Q N G S W F T A E V E E N E A N G Q F Y E C S K S D D
TGGCAGCAAGCTTGAACAACAGTGGGCAAGTAGGTACCTTTGCGAGGTTGTAGCAGGCTGTGTGGTGGATTTTGGAGAGGCTGTGGATGCTTCGGGTTCCATCATAT
G S K L G T T V G K *
GGTACTTCAATGTTCTGGGATTTAACTCAGTGGAGTTAAAGAGGAATCCACAAAATTAAGCTCAAAGTACTCGGTTTGGCATATTTGGTACAGAGTTTCTGGTTTGTTT
TTGGGGCTAAAACTTGGTTTTCTGGGCTGTTAAACAAGTTGTTCTTGTGCTGAGAAAAGTTGTTAGCTGTGAGGTAACCAGAGTTGTTGGATGTAGAAGTGAAGTTTGGACT
TGATGTGATAGTATTTGAGTTGATCGAGTGAATACAAGTTCCGCTGAAAAATTTCAAAATTTGTGTTTCGTTTGGCTGGTTTCTGGGGCTGTTTCTGGATCGTTCTTGAGGG
AATTCAGCTGGATGTTGTTTGTGTTGGAAAGTAGGCATGTTGACTGAAGAGGGAAGTGGAGAGTTAATGAGCTAAGGTGGAGATTGTTGGAGAAATTAGCTCATGAACCT
PPT
GGCTAGTTGGAGCTGAAAACCTGGTTGCATGGTTTTGTTTCTGGTTGTGTGAAGAATCGTCGATGCTTATGAGAAGAAAATGCAGTGGGAAGAGTAAAGAGTTATAAGTGTGT
TATCACTTATAAAGTTGCTGTTTACTATATCACGTTTTCTTTGAGAGCTGCACATGGGAACCGTTAATGAGCAGTTTAAAGCTGAAGCAAGATTGTTGTTCTGTTAGTT
CGGTTTCAAGTAGCAGTTTTCAGATCTCATAACTTGGTGTGTAGTTAGCCAATTTAAGCGATTTAAATTCGGTTGAAAAGCTCACATTACATACAACACATTGTAACCTCA
TCATACTCAATAAAATTTCTCTTCTCGTCCCGTAGGAGTAGGGCTAAAAGTTAGCCGCCAACCAGCTTAAATCTGTTTCTTCTGAGACTTTTCTGATTTTCTGTTCTTATCA
ATCAAGTTTCTTTGATCCAAACCGGTAGTAAACATATACAAGACTTGTAACTTTAATCTTGAGCATCTAAGAGCAAGAATTCTCAAAGTAAATTAATAGGTACTCT...
```

**Fig. S3** Sequence of the 5'-upstream region of *F3H* in CrW. The figure shows 5 bp of the target site duplication (TSD; blue letters), 560 bp of long terminal repeats (LTRs; red letters), the primer binding site (PBS; green letters), and the polypurine tract (PPT; brown letters). The amino acid sequence deduced from the open reading frame (ORF) is indicated by black letters.

## Additional file 2: Figure S4

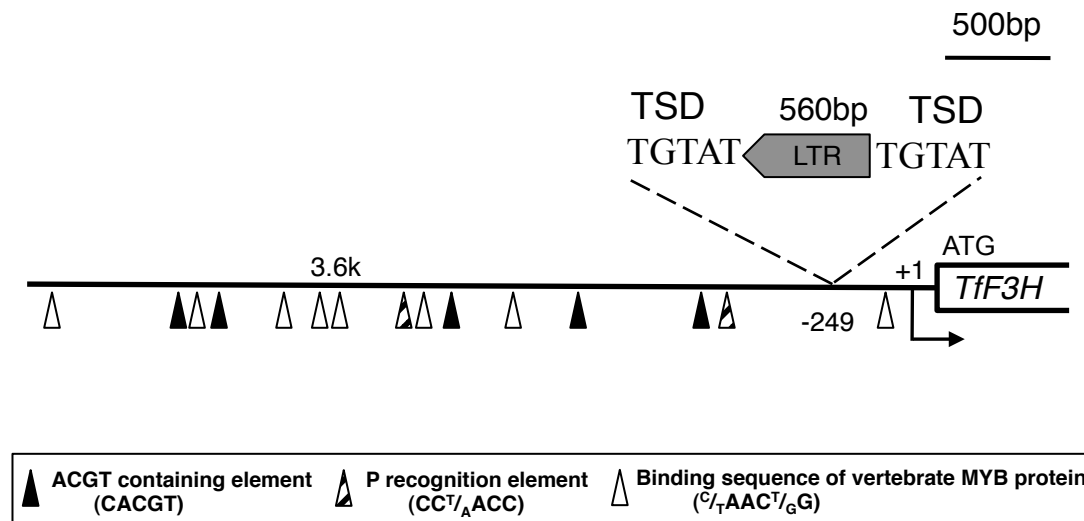

**Fig. S4 Insertion of the solo-LTR in 5'-upstream region of *F3H* in CrW.**

A putative solo-LTR of 560 bp was identified in *F3H* promoter of CrW. It was flanked by 5-bp target site duplications (TSD) and the position was identical to the *TORE1* insertion site.

## Additional file 2: Figure S5

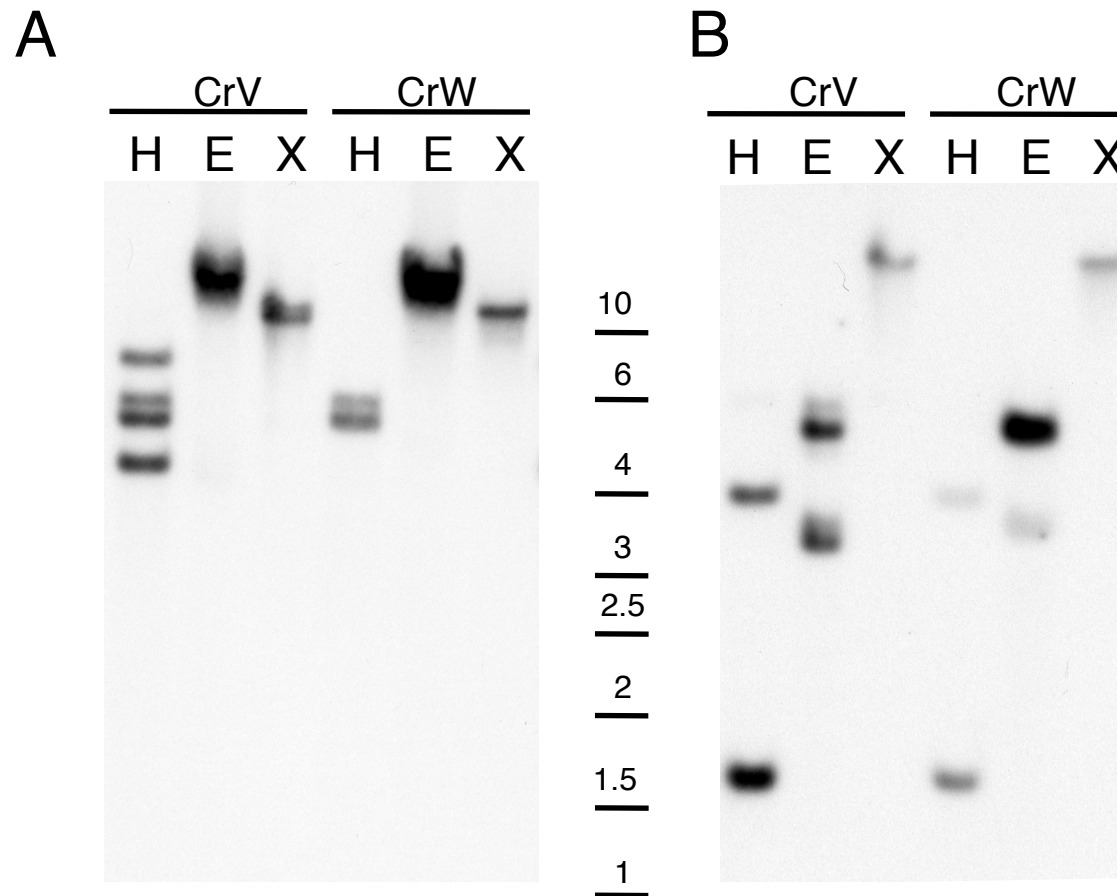

**Fig. S5 Southern blot analysis of *F3'H* and *F3'5'H* in CrV and CrW.**

Total genomic DNAs were digested with *Hind* III (H), *Eco* RI (E), and *Xba* I (X) and transferred to nylon membranes as described in Methods. Membranes were probed with DIG-labeled sequences of *F3'H* (A) and *F3'5'H* (B). DNA marker sizes (kbp) are shown.

## Additional file 2: Figure S6

CrV

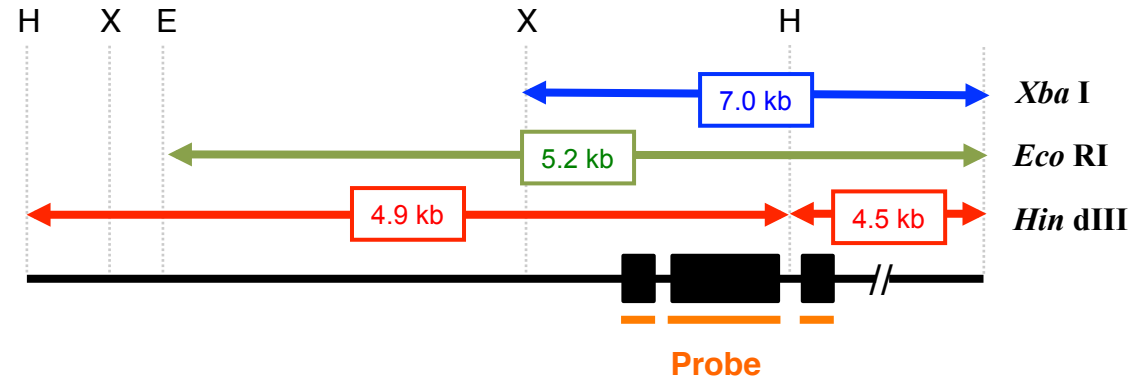

CrW

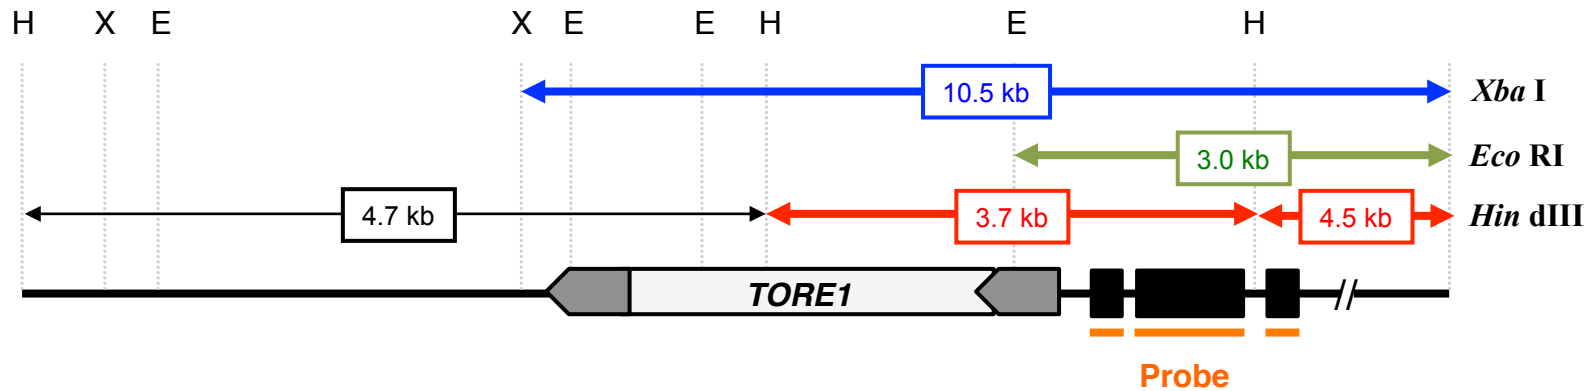

**Fig. S6 Schematic diagram of the genomic structure of the *F3H* gene in CrV and CrW.**

Sites of restriction enzymes *Xba* I, *Eco* RI, and *Hind* III used in the Southern blot analysis are shown. Restriction sites at the 3'-proximal region were deduced from the results of Figure 4. Lengths following complete digestion are shown in blue, green, and red for *Xba* I, *Eco* RI and *Hind* III, respectively. The *F3H* probe used is shown in orange.

## Additional file 2: Figure S7

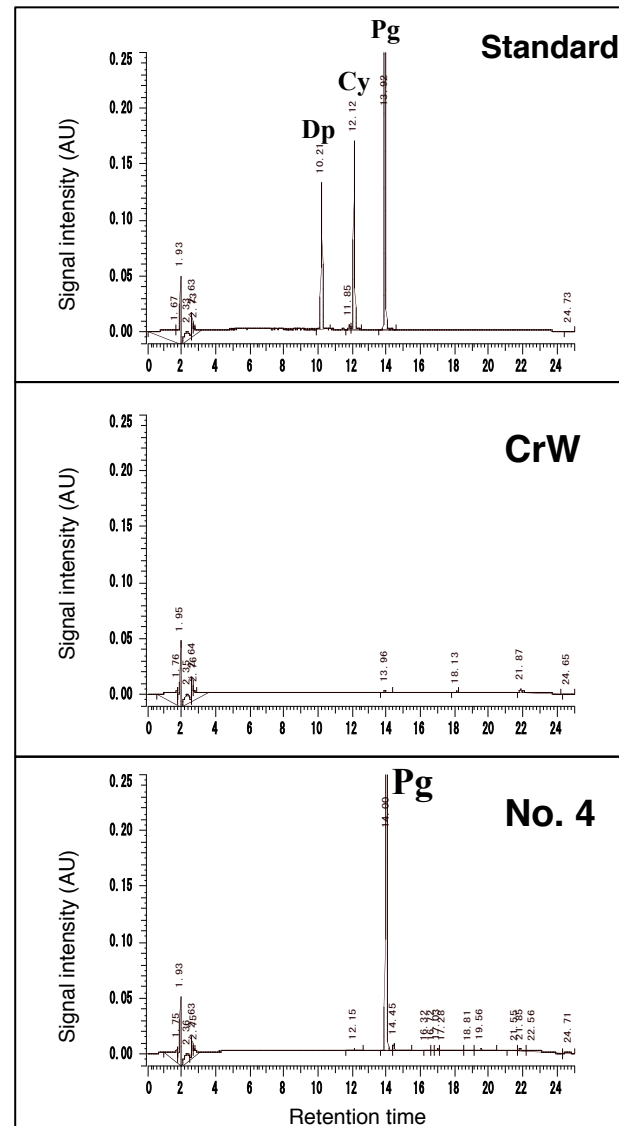

**Fig. S7 HPLC analysis of flower petal anthocyanidins in *GtF3H*-overexpressing transgenic CrW.**

After acid hydrolysis of petal extracts, the hydrolysates containing anthocyanidins were subjected to HPLC analysis. Dp, Cy, and Pg correspond to delphinidin, cyanidin, and pelargonidin, respectively.

## Additional file 2: Figure S8

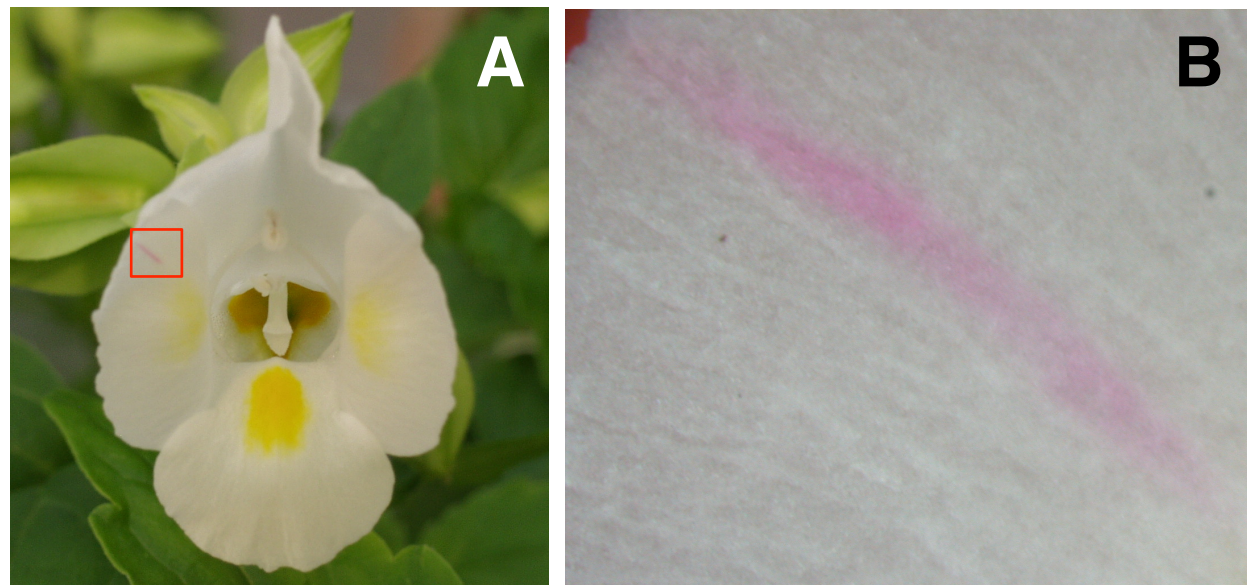

**Fig. S8 Example of pigment recovery in a CrW petal.**

(A) Whole flower. (B) Magnification of boxed red area in A.
